# Supplementary material for: Efficacy and Safety of Platelet-Rich Plasma Injections for the Treatment of Female Sexual Dysfunction and Stress Urinary Incontinence: A Systematic Review
Source: MDPI journal article supplement (doi:10.3390/biomedicines11112919), 2023-10-28
Supplement: s1 [file s1]

# Data Supplement

## Table of Contents

|                                                                                                   |          |
|---------------------------------------------------------------------------------------------------|----------|
| <i>Data Supplement 1: PubMed search syntax and search string .....</i>                            | <i>2</i> |
| <i>Data Supplement 2: Reference list of all excluded studies with reasons for exclusion .....</i> | <i>4</i> |
| <i>Data Supplement 3: Risk of bias of RCTs.....</i>                                               | <i>5</i> |
| <i>Data Supplement 4: Risk of bias in non-RCTs.....</i>                                           | <i>6</i> |

## Data Supplement 1: PubMed search syntax and search string

### **Search syntax**

| <b>ID</b> | <b>Search</b>                     |
|-----------|-----------------------------------|
| #1        | pharmacol res perspect [Journal]  |
| #2        | prp [All Fields]                  |
| #3        | platelet rich plasma [MeSH Terms] |
| #4        | platelet rich [All Fields]        |
| #5        | plasma [All Fields]               |
| #6        | AND #4-5                          |
| #7        | platelet [All Fields]             |
| #8        | rich [All Fields]                 |
| #9        | plasma [All Fields]               |
| #10       | AND #7-9                          |
| #11       | platelet rich plasma [All Fields] |
| #12       | OR #1-3,6,10-11                   |
| #13       | orgasm [MeSH Terms]               |
| #14       | orgasm [All Fields]               |
| #15       | orgasmic [All Fields]             |
| #16       | orgasms [All Fields]              |
| #17       | vagina [MeSH Terms]               |
| #18       | vagina [All Fields]               |
| #19       | vaginas [All Fields]              |
| #20       | vagina s [All Fields]             |
| #21       | vaginae [All Fields]              |
| #22       | incontinance [All Fields]         |
| #23       | incontinence [All Fields]         |
| #24       | incontinences [All Fields]        |
| #25       | incontinency [All Fields]         |
| #26       | incontinent [All Fields]          |
| #27       | incontinents [All Fields]         |
| #28       | clitoris [MeSH Terms]             |

- #29 clitoris [All Fields]
- #30 rejuvenate [All Fields]
- #31 rejuvenated [All Fields]
- #32 rejuvenates [All Fields]
- #33 rejuvenating [All Fields]
- #34 rejuvenation [MeSH Terms]
- #35 rejuvenation [All Fields]
- #36 rejuvenations [All Fields]
- #37 rejuvenative [All Fields]
- #38 rejuvenator [All Fields]
- #39 rejuvenators [All Fields]
- #40 OR #13-39
- #41 #12 AND #40

### **Search string**

("pharmacol res perspect"[Journal] OR "prp"[All Fields] OR ("platelet rich plasma"[MeSH Terms] OR ("platelet rich"[All Fields] AND "plasma"[All Fields]) OR "platelet rich plasma"[All Fields] OR ("platelet"[All Fields] AND "rich"[All Fields] AND "plasma"[All Fields]) OR "platelet rich plasma"[All Fields])) AND ("orgasm"[MeSH Terms] OR "orgasm"[All Fields] OR "orgasmic"[All Fields] OR "orgasms"[All Fields] OR ("vagina"[MeSH Terms] OR "vagina"[All Fields] OR "vaginas"[All Fields] OR "vagina s"[All Fields] OR "vaginae"[All Fields]) OR ("incontinance"[All Fields] OR "incontinence"[All Fields] OR "incontinences"[All Fields] OR "incontinency"[All Fields] OR "incontinent"[All Fields] OR "incontinents"[All Fields]) OR ("clitoris"[MeSH Terms] OR "clitoris"[All Fields]) OR ("rejuvenate"[All Fields] OR "rejuvenated"[All Fields] OR "rejuvenates"[All Fields] OR "rejuvenating"[All Fields] OR "rejuvenation"[MeSH Terms] OR "rejuvenation"[All Fields] OR "rejuvenations"[All Fields] OR "rejuvenative"[All Fields] OR "rejuvenator"[All Fields] OR "rejuvenators"[All Fields]))

The search strategy was modified accordingly for the other databases.

## Data Supplement 2: Reference list of all excluded studies with reasons for exclusion

### Duplicate publications or data presented in part and then in whole in future publications

- [1] Apolikhina I, Gorbunova E, Saidova A, Sukhikh G. Prp injections in the treatment for stress urinary incontinence. *International Urogynecology Journal*, 2017 Jan;28(1):S233-S234.
- [2] Kalantzis C, Athanasiou S, Zacharakis D, Petrakis V, Pontikaki A, Grigoriadis T. The role of platelet rich plasma (PRP) for treatment of stress urinary incontinence. *Female Pelvic Medicine and Reconstructive Surgery*, 2021 Jan;27(10):E664-E664.
- [3] Manin E, Taraschi G, Berndt S, Martinez de Tejada B, Abdulcadir J. Autologous Platelet-Rich Plasma for Clitoral Reconstruction: A Case Study. *Arch Sex Behav*. 2022 Jan;51(1):673-678. doi: 10.1007/s10508-021-02172-9. Epub 2021 Nov 15. PMID: 34779981; PMCID: PMC8858308.

### Inappropriate therapy

- [1] Al-Hamadani IT, Shehab E mahmod, aziz NA. Comparative Changes in Sexual Dysfunction of Married Women after Colpoperineorrhaphy Versus Colpoperineorrhaphy with Additional Platelet Rich Plasma Injection. *Indian Jour of Foren Med & Toxicol* 2019;13:314. <https://doi.org/10.5958/0973-9130.2019.00309.8>.
- [2] Luksenburg A, Barcia JJ, Sergio R, Fernandez S, Pelosi MA, Pelosi MA. Stress Urinary Incontinence: Treatment With Platelet-Rich-Plasma Injection and Placement of Polydioxanone Threads—A Pilot Study. *Am J Cosmet Surg* 2022;39:76–84. <https://doi.org/10.1177/0748806821998100>.
- [3] Medel S, Alarab M, Kufaiishi H, Drutz H, Shynlova O. Attachment of Primary Vaginal Fibroblasts to Absorbable and Nonabsorbable Implant Materials Coated With Platelet-Rich Plasma: Potential Application in Pelvic Organ Prolapse Surgery. *Female Pelvic Med Reconstr Surg*. 2015 Jul-Aug;21(4):190-7. doi: 10.1097/SPV.000000000000178. PMID: 25900058.

### Irrelevant data

- [1] Aguilar P, Hersant B, SidAhmed-Mezi M, Bosc R, Vidal L, Meningaud JP. Novel technique of vulvo-vaginal rejuvenation by lipofilling and injection of combined platelet-rich-plasma and hyaluronic acid: a case-report. *SpringerPlus* 2016;5:1184. <https://doi.org/10.1186/s40064-016-2840-y>.
- [2] Jiang Y, Lee P, Lee Y, Kuo H. Urethral sphincter injections of platelet-rich plasma (PRP) in treatment of urinary incontinence due to intrinsic sphincteric deficiency refractory to conventional treatment. *Neurourology and Urodynamics*, 2019 Jan;38(0):S262-S263.
- [3] Jiang YH, Lee PJ, Kuo HC. Therapeutic Efficacy of Urethral Sphincter Injections of Platelet-Rich Plasma for the Treatment of Stress Urinary Incontinence due to Intrinsic Sphincter Deficiency: A Proof-of-Concept Clinical Trial. *Int Neurourol J*. 2021 Mar;25(1):51-58. doi: 10.5213/inj.2040272.136. Epub 2021 Jan 19. PMID: 33504126; PMCID: PMC8022168.
- [4] Khera B. Efficacy of PRP in genitourinary syndrome of menopause: A prospective study. *BJOG: An International Journal of Obstetrics and Gynaecology*, 2021 Jan;128(0):214-215.
- [5] Willison FB, Nguyen T. Innovative treatment of uterovaginal prolapse with autologous membrane from platelet rich plasma. *BJOG: An International Journal of Obstetrics and Gynaecology*, 2021 Jan;126(0):235-235.

### Irrelevant evaluation tool

- [1] Behnia-Willison F, Pour NR, Mohamadi B, Willison N, Rock M, Holten IW, O'Shea R, Miller J. Use of Platelet-rich Plasma for Vulvovaginal Autoimmune Conditions Like Lichen Sclerosus. *Plast Reconstr Surg Glob Open*. 2016 Nov 23;4(11):e1124. doi: 10.1097/GOX.0000000000001124. PMID: 27975027; PMCID: PMC5142493.
- [2] Castellani D, Valloni A, Piccirilli A, Paradiso Galatioto G, Vicentini C. An innovative approach to treating vaginal mesh exposure after abdominal sacral colpopexy: endoscopic resection of mesh and platelet-rich plasma; initial experience in three women. *Int Urogynecol J*. 2017 Feb;28(2):325-327. doi: 10.1007/s00192-016-3154-x. Epub 2016 Sep 21. PMID: 27655187.
- [3] Goldstein AT, King M, Runels C, Gloth M, Pfau R. Intradermal injection of autologous platelet-rich plasma for the treatment of vulvar lichen sclerosus. *J Am Acad Dermatol*. 2017 Jan;76(1):158-160. doi: 10.1016/j.jaad.2016.07.037. PMID: 27986140.
- [4] Kim SH, Park ES, Kim TH. Rejuvenation Using Platelet-rich Plasma and Lipofilling for Vaginal Atrophy and Lichen Sclerosus. *J Menopausal Med*. 2017 Apr;23(1):63-68. doi: 10.6118/jmm.2017.23.1.63. Epub 2017 Apr 28. PMID: 28523261; PMCID: PMC5432469.
- [5] Posey LK, Runels C. In office surgery and use of platelet rich plasma for treatment of vulvar lichen sclerosus to alleviate painful sexual intercourse. *Journal of Lower Genital Tract Disease*, 2017 Jan;21(4):S14-S14.

### Data Supplement 3: Risk of bias of RCTs

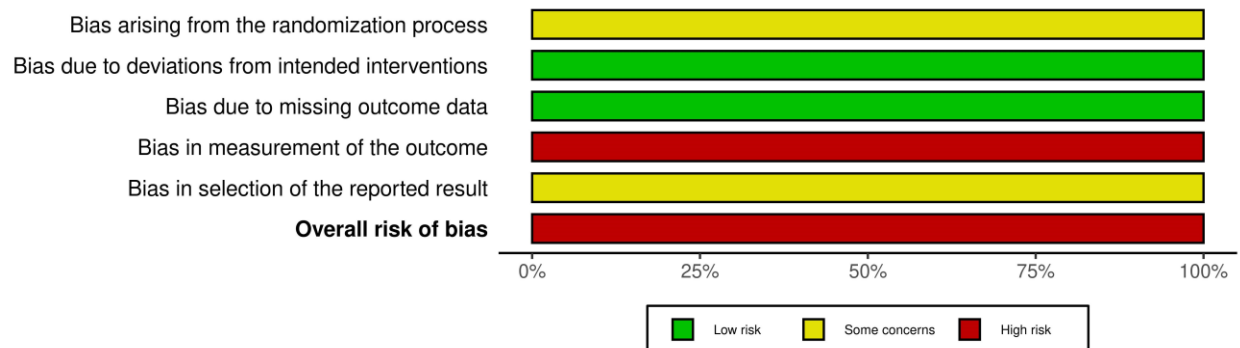

Data Supplement 3.1: Overall risk of bias assessment according to the RoB-2 for RCTs.

|       |                                                                                                                                                                                                                                                             | Risk of bias domains                                                                |                                                                                     |                                                                                     |                                                                                       |                                                                                                                                                                                                                                                                                                             |                                                                                       |
|-------|-------------------------------------------------------------------------------------------------------------------------------------------------------------------------------------------------------------------------------------------------------------|-------------------------------------------------------------------------------------|-------------------------------------------------------------------------------------|-------------------------------------------------------------------------------------|---------------------------------------------------------------------------------------|-------------------------------------------------------------------------------------------------------------------------------------------------------------------------------------------------------------------------------------------------------------------------------------------------------------|---------------------------------------------------------------------------------------|
|       |                                                                                                                                                                                                                                                             | D1                                                                                  | D2                                                                                  | D3                                                                                  | D4                                                                                    | D5                                                                                                                                                                                                                                                                                                          | Overall                                                                               |
| Study | Daneshpajooch 2021                                                                                                                                                                                                                                          |  |  |  |  |                                                                                                                                                                                                                        |  |
|       | Domains:<br>D1: Bias arising from the randomization process.<br>D2: Bias due to deviations from intended intervention.<br>D3: Bias due to missing outcome data.<br>D4: Bias in measurement of the outcome.<br>D5: Bias in selection of the reported result. |                                                                                     |                                                                                     |                                                                                     |                                                                                       | Judgement<br> High<br> Some concerns<br> Low |                                                                                       |

Data Supplement 3.2: Study-by-study risk of bias assessment according to the RoB-2 for RCTs.

## Data Supplement 4: Risk of bias in non-RCTs

| Study             | Selection                                |                                     |                           |                                                                          | Comparability                                        | Outcome               |                                            |                                  | Total selection score | Total comparability score | Total outcome score | Quality  |
|-------------------|------------------------------------------|-------------------------------------|---------------------------|--------------------------------------------------------------------------|------------------------------------------------------|-----------------------|--------------------------------------------|----------------------------------|-----------------------|---------------------------|---------------------|----------|
|                   | Representativeness of the exposed cohort | Selection of the non exposed cohort | Ascertainment of exposure | Demonstration that outcome of interest was not present at start of study | Comparability of cohorts based on design or analysis | Assessment of outcome | Follow-up long enough for outcome to occur | Adequacy of follow up of cohorts |                       |                           |                     |          |
| Amirzargar 2016   | 1                                        |                                     |                           | 1                                                                        | 2                                                    |                       | 1                                          | 1                                | 2                     | 2                         | 2                   | Moderate |
| Apolikhina 2018   | 1                                        |                                     |                           | 1                                                                        | 2                                                    |                       | 1                                          | 1                                | 2                     | 2                         | 2                   | Moderate |
| Athanasiou 2021   |                                          |                                     |                           | 1                                                                        | 2                                                    |                       | 1                                          | 1                                | 1                     | 2                         | 2                   | Moderate |
| Chiang 2022       | 1                                        |                                     |                           | 1                                                                        | 2                                                    |                       | 1                                          | 1                                | 2                     | 2                         | 2                   | Moderate |
| Hersant 2018      | 1                                        |                                     |                           | 1                                                                        | 2                                                    |                       | 1                                          | 1                                | 2                     | 2                         | 2                   | Moderate |
| Long 2021         | 1                                        |                                     | 1                         | 1                                                                        | 1                                                    |                       | 1                                          | 1                                | 3                     | 1                         | 2                   | Moderate |
| Romashchenko 2022 |                                          |                                     |                           | 1                                                                        | 2                                                    |                       | 1                                          | 1                                | 1                     | 2                         | 2                   | Moderate |
| Runels 2014       | 1                                        |                                     |                           | 1                                                                        | 2                                                    |                       | 1                                          | 1                                | 2                     | 2                         | 2                   | Moderate |

| Study       | Selection                                |                                     |                           |                                                                          | Comparability                                        | Outcome               |                                            |                                  | Total selection score | Total comparability score | Total outcome score | Quality  |
|-------------|------------------------------------------|-------------------------------------|---------------------------|--------------------------------------------------------------------------|------------------------------------------------------|-----------------------|--------------------------------------------|----------------------------------|-----------------------|---------------------------|---------------------|----------|
|             | Representativeness of the exposed cohort | Selection of the non exposed cohort | Ascertainment of exposure | Demonstration that outcome of interest was not present at start of study | Comparability of cohorts based on design or analysis | Assessment of outcome | Follow-up long enough for outcome to occur | Adequacy of follow up of cohorts |                       |                           |                     |          |
| Saleh 2022  | 1                                        |                                     | 1                         | 1                                                                        | 2                                                    |                       | 1                                          |                                  | 3                     | 2                         | 1                   | Moderate |
| Sukgen 2019 | 1                                        |                                     |                           | 1                                                                        | 2                                                    |                       | 1                                          | 1                                | 2                     | 2                         | 2                   | Moderate |
| Tahoon 2022 | 1                                        |                                     |                           | 1                                                                        | 2                                                    |                       | 1                                          | 1                                | 2                     | 2                         | 2                   | Moderate |

Data Supplement 4: Study-by-study risk of bias assessment according to the Newcastle-Ottawa Scale (NOS) in included non-RCTs.
